# Supplementary material for: Characterization of Different Types of Epiretinal Proliferations by Synchrotron Radiation-Based Fourier Transform Infrared Micro-Spectroscopy
Source: MDPI journal article supplement (doi:10.3390/ijms24054834), 2023-03-02
Supplement: s1 [file s1]

## Supplementary file

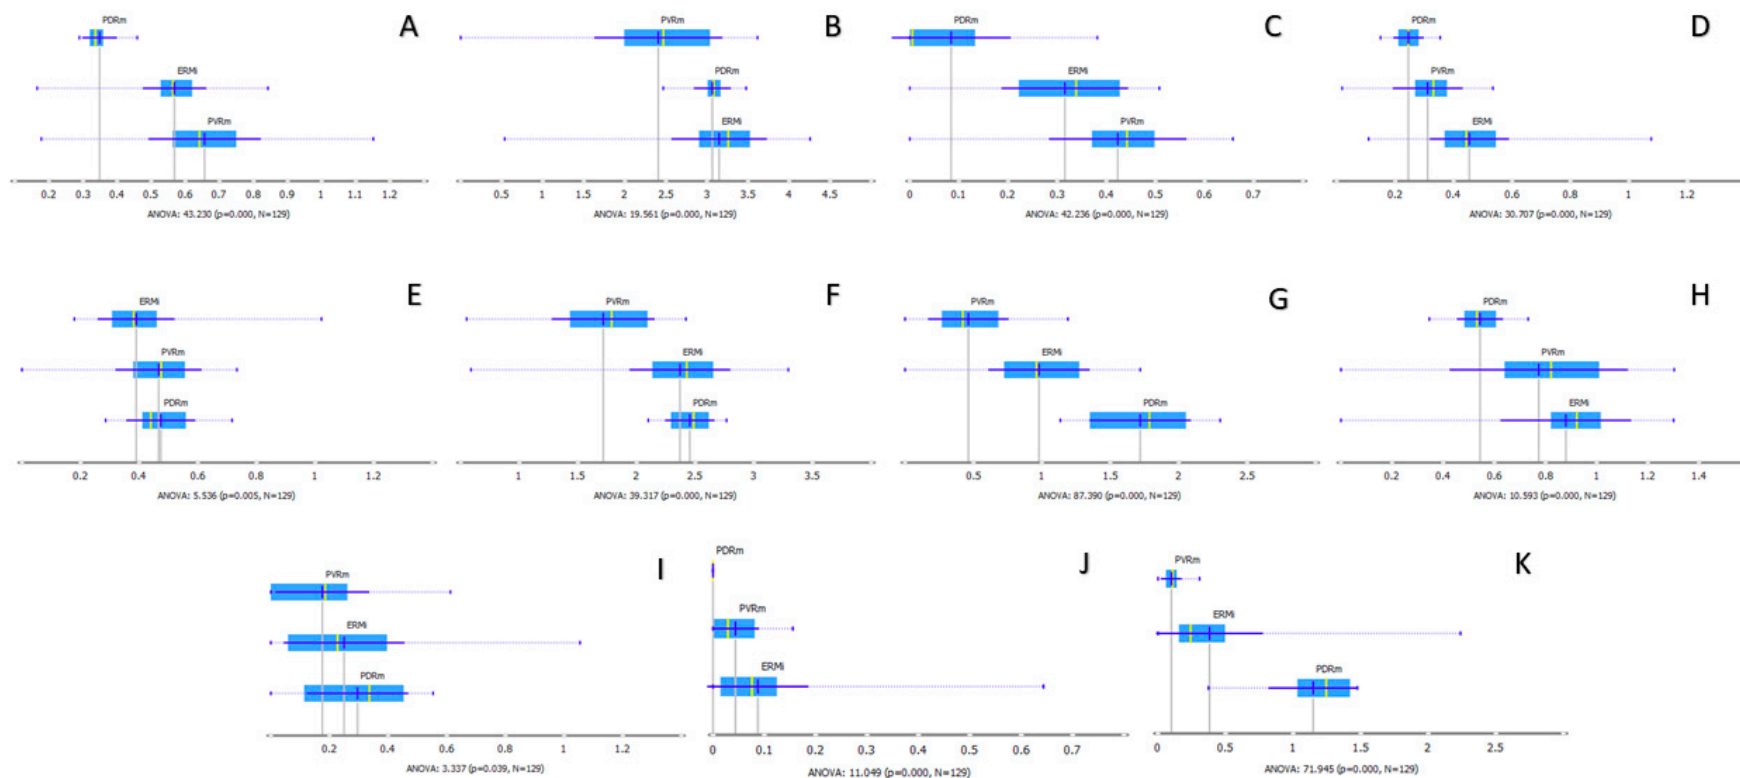

**Figure S1.** Box plots of the areas below each Gaussian curve for ERMi, PVRm and PDRm, representing: a) Tyr (1515  $\text{cm}^{-1}$ ), b)  $\alpha$ -helices in Amide II (1548  $\text{cm}^{-1}$ ), c) side chain as Tyr, Glu, and Asp residues (1595  $\text{cm}^{-1}$ ), d) side chains such as Tyr and Asn (1610  $\text{cm}^{-1}$ ), e) cross- $\beta$ -sheet (1625  $\text{cm}^{-1}$ ), f)  $\beta$ -sheet (1635  $\text{cm}^{-1}$ ), g) and h) turns and loops (1666  $\text{cm}^{-1}$  and 1681  $\text{cm}^{-1}$ ), i) oligomers (1693  $\text{cm}^{-1}$ ), and j) carbonyl group (1740  $\text{cm}^{-1}$ ). k) 1580  $\text{cm}^{-1}$  was added to achieve a better baseline. Values are presented with the probability density of the data at different values and mean  $\pm$  SD.
